# Supplementary material for: Validating HY-2A CMR Precipitable Water Vapor Using Ground-based and Shipborne GNSS Observations
Source: Copernicus journal article supplement (doi:10.5194/amt-2019-503), 2020-03-19

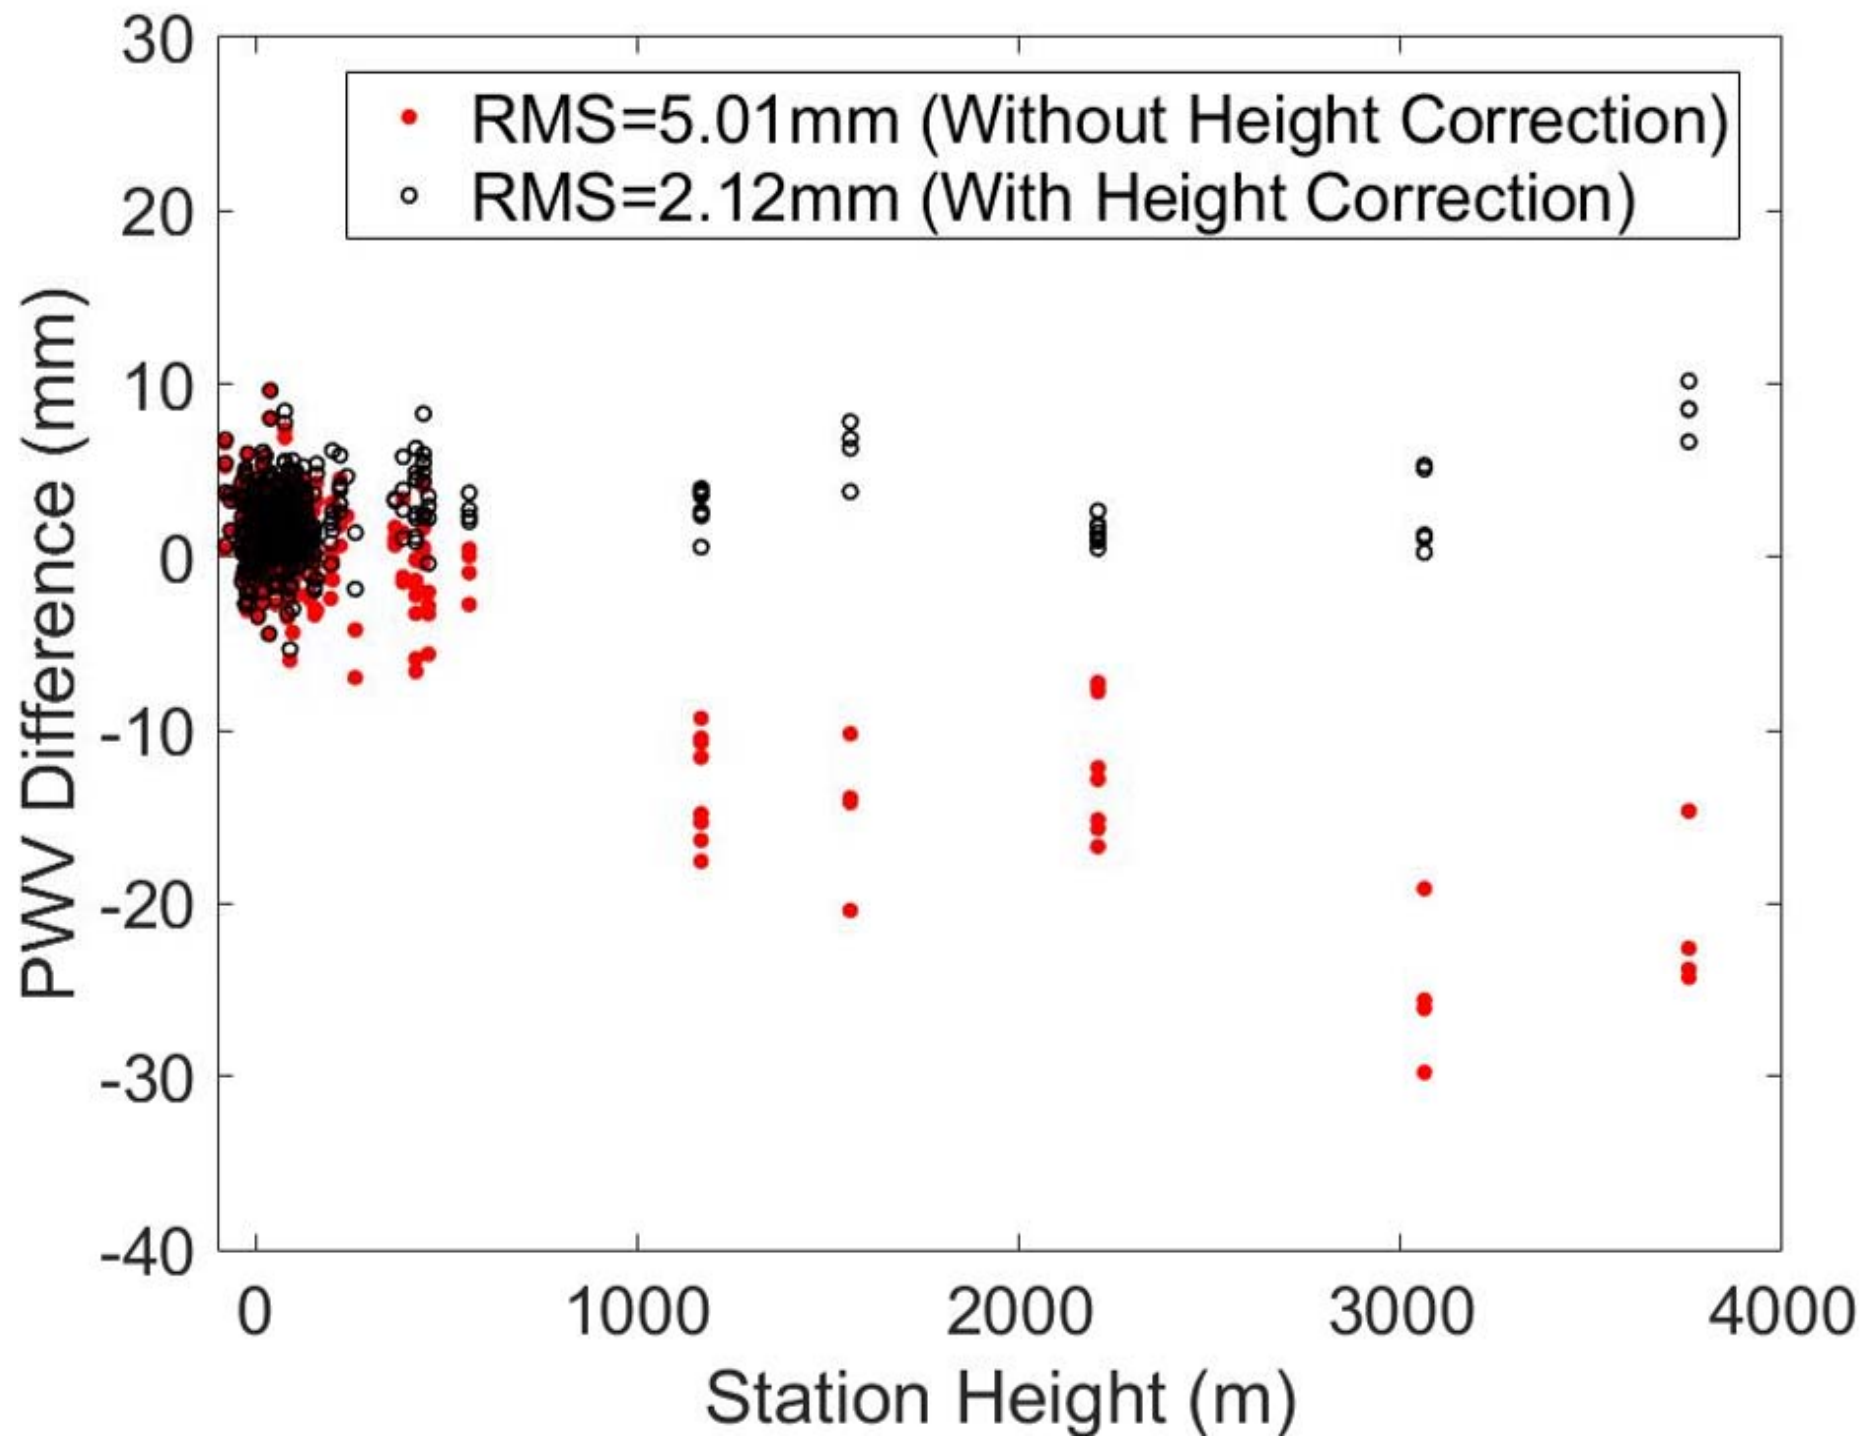

Supplement: Supplementary file [file amt-2019-503-AC1-supplement.pdf]
